# Supplementary material for: Sex pheromone communication in an insect parasitoid, Campoletis chlorideae Uchida
Source: PubMed Central journal article supplement — Proc Natl Acad Sci U S A. 2022 Nov 29;119(49):e2215442119. doi: 10.1073/pnas.2215442119 (PMC9894188; doi:10.1073/pnas.2215442119), 2022-11-29
Supplement: pnas.2215442119.sapp.pdf [file pnas.2215442119.sapp.pdf]

## Supporting Information for

### Sex pheromone communication in an insect parasitoid, *Campoletis chlorideae* Uchida

Hao Guo<sup>a,b,1</sup>, Bao-Tong Mo<sup>a,b,1</sup>, Guo-Cheng Li<sup>a,b</sup>, Zi-Lin Li<sup>a,b</sup>, Ling-Qiao Huang<sup>a</sup>, Ya-Lan Sun<sup>c</sup>, Jun-Feng Dong<sup>c</sup>, Dean P. Smith<sup>d</sup>, Chen-Zhu Wang<sup>a,b,\*</sup>

<sup>a</sup> State Key Laboratory of Integrated Management of Pest Insects and Rodents, Institute of Zoology, Chinese Academy of Sciences, Beijing 100101, P. R. China;

<sup>b</sup> CAS Center for Excellence in Biotic Interactions, University of Chinese Academy of Sciences, Beijing 100049, P. R. China;

<sup>c</sup> Forest College, Henan University of Science and Technology, Luoyang, PR China;

<sup>d</sup> Departments of Neuroscience and Pharmacology, University of Texas Southwestern Medical Center, 5323 Harry Hines Blvd, Dallas, TX 75390-9111, USA.

1. H.G. and B.M. contribute equally to this work.

\*Corresponding author: Chen-Zhu Wang

**Email:** czwang@ioz.ac.cn

#### **This PDF file includes:**

Supporting text  
Figures S1 to S4  
Tables S1 to S2

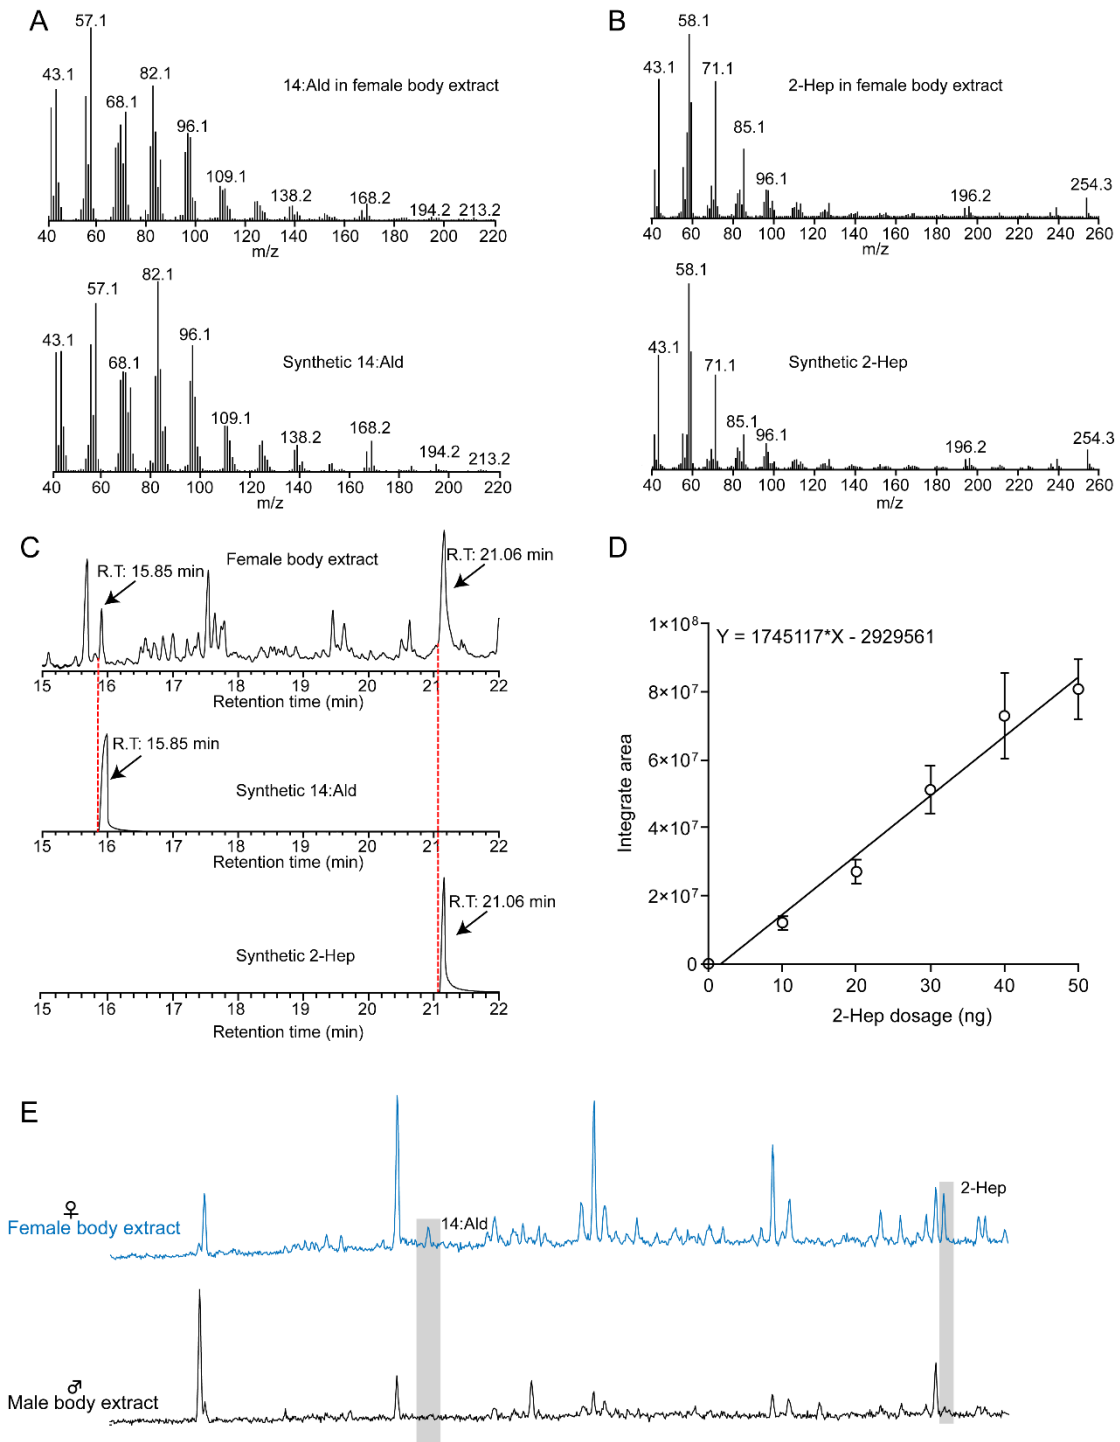

**Figure S1. Gas Chromatography-Mass Spectrometer analysis of male and female body extract. (A-B)** Mass spectra of candidate sex pheromones in female body extract and synthetic compounds. **(C)** Total ion chromatogram (TIC) of the candidate sex pheromone components and synthetic compounds. **(D)** The regression of synthetic 2-Hep in GC-MS. The X-axis represents sampling dosages and the Y-axis indicates the integrated area. **(E)** Comparison of TIC of female (upper) and male (lower) body extracts.

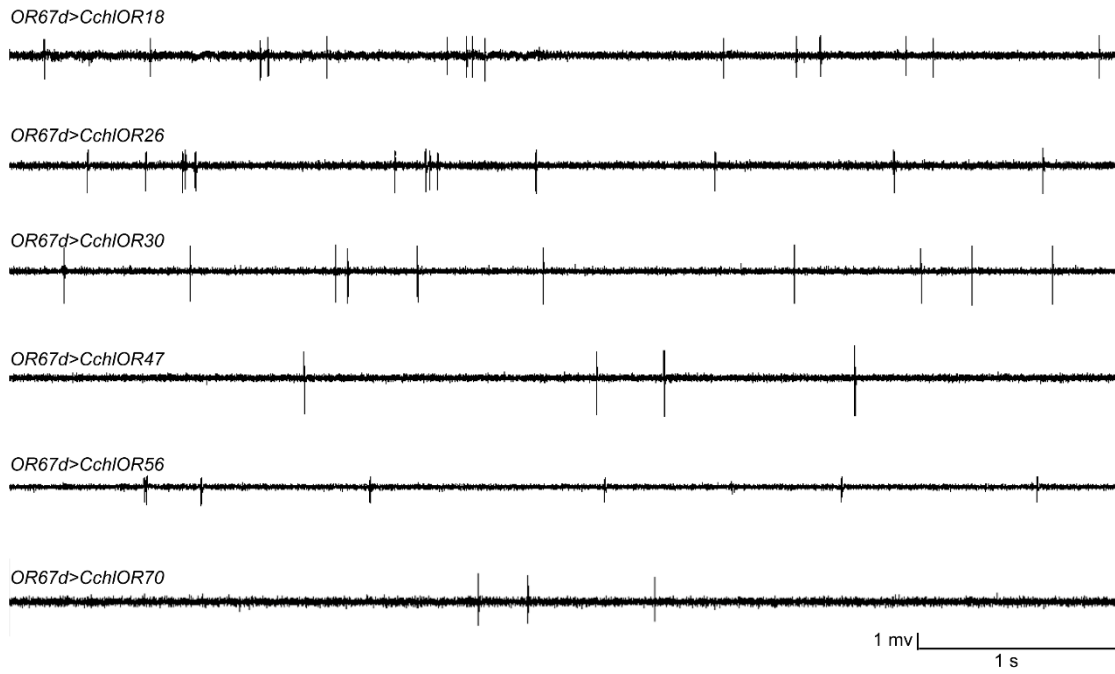

**Figure S2. Spontaneous spiking of the *Drosophila* T1 neurons expressing CchIORs.**

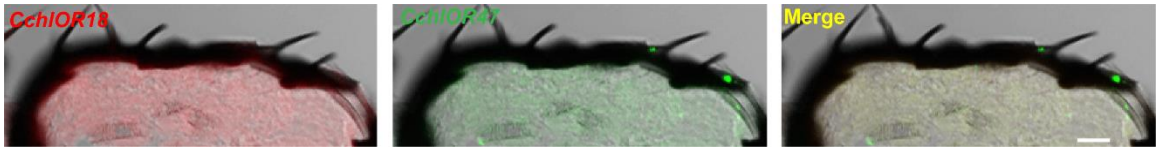

**Figure S3. Staining of the micro-sections of virgin antennae with the sense-probes of CchIOR18 (red) and CchIOR47 (green). Scale bar represents 10  $\mu$ m.**

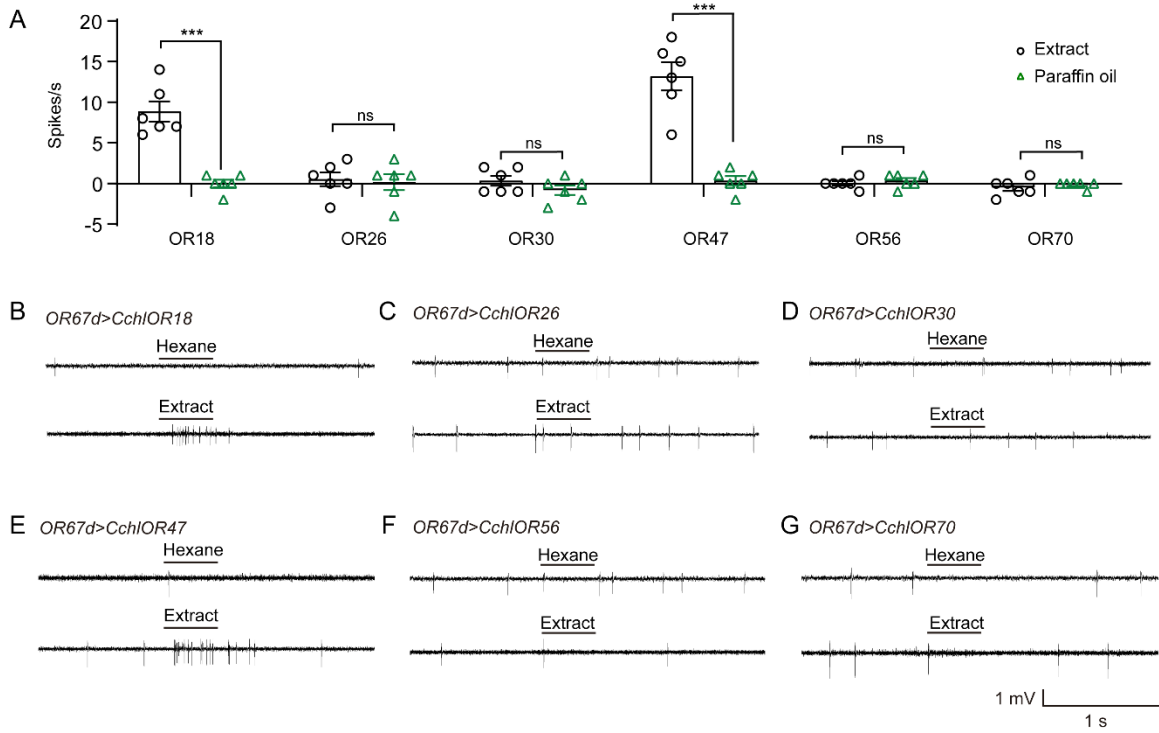

**Figure S4. The responses of CchIOR-expressing T1 neurons to hexane extracts of female bodies. (A)** Response spikes of CchIOR-expressing T1 neurons to 10  $\mu$ L of concentrated hexane extracts (equivalent to 5 females) and to 10  $\mu$ L of hexane. ( $n = 6$  flies for each genotype). **(B-G)** Representative traces of the responses of CchIOR18-, CchIOR26-, CchIOR30-, CchIOR47-, CchIOR56-, and CchIOR70-expressing neurons to body extracts and hexane, respectively.  $P < 0.001$  by two-tailed student  $t$ -test.

**Table S1. Chemicals used for single sensillum recordings**

|                      | Order | Chemicals                                | Vendor        | Purity | CAS#       |
|----------------------|-------|------------------------------------------|---------------|--------|------------|
| Green leaf volatiles | 1     | 1-hexanol                                | Fluka         | 99%    | 111-27-3   |
|                      | 2     | 2-hexanol                                | Aldrich       | 99%    | 626-93-7   |
|                      | 3     | 3-hexanol                                | Fluka         | 99%    | 623-37-0   |
|                      | 4     | 4-hexanol                                | Aldrich       | 97%    | 928-92-7   |
|                      | 5     | 5-hexanol                                | Aldrich       | 99%    | 821-41-0   |
|                      | 6     | (Z)-2-hexenol                            | Fluka         | 95%    | 928-94-9   |
|                      | 7     | (Z)-3-hexenol                            | TCI           | 96%    | 928-96-1   |
|                      | 8     | (E)-2-hexenol                            | Fluka         | 95%    | 928-95-0   |
|                      | 9     | (E)-3-hexenol                            | Roth          | 98%    | 928-97-2   |
|                      | 10    | Hexanal                                  | TCI           | 99%    | 66-25-1    |
|                      | 11    | (Z)-3-hexenal                            | Sigma-Aldrich | 95%    | 6789-80-6  |
|                      | 12    | (E)-2-hexenal                            | Sigma-Aldrich | 95%    | 6728-26-3  |
|                      | 13    | Hexyl acetate                            | Fluka         | 99%    | 142-92-7   |
|                      | 14    | (Z)-3-hexenyl acetate                    | Roth          | 97%    | 3681-71-8  |
|                      | 15    | (E)-2-hexenyl acetate                    | Sigma-Aldrich | 98%    | 2497-18-9  |
|                      | 16    | (Z)-2-hexenyl acetate                    | Sigma-Aldrich | 95%    | 56922-75-9 |
| Terpenoids           | 17    | 2-carene                                 | Sigma-Aldrich | 97%    | 4497-92-1  |
|                      | 18    | 3-carene                                 | Sigma-Aldrich | 99%    | 498-15-7   |
|                      | 19    | (E)- $\beta$ -caryophyllene              | Sigma-Aldrich | 98%    | 87-44-5    |
|                      | 20    | $\alpha$ -caryophyllene                  | TCI           | 93%    | 6753-98-6  |
|                      | 21    | E- $\beta$ -farnesene                    | Sigma-Aldrich | 90%    | 18794-84-8 |
|                      | 22    | farnesene ( $\alpha$ & $\beta$ mixture ) | Sigma-Aldrich |        |            |
|                      | 23    | indole                                   | TCI           | 99%    | 120-72-9   |
|                      | 24    | linalool                                 | Sigma-Aldrich | 97%    | 78-70-6    |
|                      | 25    | linalool oxide                           | TCI           | 97%    | 60047-17-8 |
|                      | 26    | S-(-)-limonene                           | Sigma-Aldrich | 96%    | 5989-54-8  |
|                      | 27    | R-(+)-limonene                           | Fluka         | 98%    | 5989-27-5  |
|                      | 28    | $\beta$ -mycene                          | Sigma-Aldrich | 90%    | 123-35-3   |
|                      | 29    | E- $\beta$ -ocimene                      | Sigma-Aldrich | 90%    | 3779-61-1  |
|                      | 30    | $\alpha$ -pinene                         | Aldrich       | 98%    | 7785-26-4  |
|                      | 31    | $\beta$ -pienne                          | Macklin       | 98%    | 18172-67-3 |
|                      | 32    | $\alpha$ -terpinene                      | Fluka         | 99%    | 99-83-2    |
|                      | 33    | $\gamma$ -terpinene                      | TCI           | 95%    | 99-85-4    |
|                      | 34    | DMNT                                     | Kunbo         | 92%    | 19945-61-0 |
|                      | 35    | TMTT                                     | Kunbo         | 92%    | 62235-06-7 |
|                      | 36    | $\alpha$ -phellandrene                   | Sigma-Aldrich | 95%    | 99-83-2    |
|                      | 37    | $\beta$ -phellandrene                    | TRC           | 96%    | 555-10-2   |
|                      | 38    | $\alpha$ -humulene                       | Sigma-Aldrich | 96%    | 6753-98-6  |
|                      | 39    | geraniol                                 | Sigma-Aldrich | 98%    | 106-24-1   |
|                      | 40    | guaiene                                  | Sigma         | 92%    | 88-84-6    |
|                      | 41    | sabinene                                 | Yuanye        | 98%    | 3387-41-5  |
|                      | 42    | citronellal                              | Roth          | 96%    | 106-23-0   |
|                      | 43    | citronellol                              | Fluka         | 95%    | 106-22-9   |
|                      | 44    | terpinol                                 | Roth          | 97%    | 8000-41-7  |
|                      | 45    | (+,-)- $\alpha$ -terpinyl acetate        | Aldrich       | 90%    | 80-26-2    |
|                      | 46    | citral                                   | Sigma-Aldrich | 96%    | 5392-40-5  |
|                      | 47    | nerol                                    | Fluka         | 95%    | 106-25-2   |
|                      | 48    | farnesol                                 | Sigma-Aldrich | 95%    | 4602-84-0  |
|                      | 49    | farnesyl acetate                         | Sigma-Aldrich | 95%    | 29548-30-9 |

|            |                    |                         |               |             |            |
|------------|--------------------|-------------------------|---------------|-------------|------------|
| Terpenoids | 50                 | $\delta$ -decanolactone | TCI           | 97%         | 705-86-2   |
|            | 51                 | (-)-bornyl acetate      | Sigma-Aldrich | 97%         | 5655-61-8  |
|            | 52                 | (Z)-9-tricosene         | Sigma-Aldrich | 97%         | 27519-02-4 |
|            | 53                 | piperitone              | TCI           | 94%         | 89-81-6    |
|            | 54                 | (+,-)-nerolidol         | TCI           | 97%         | 7212-44-4  |
|            | 55                 | zingiberene             | TRC           | 95%         | 495-60-3   |
|            | 56                 | $\alpha$ -curcumene     | TRC           | 95%         | 644-30-4   |
|            | 57                 | $\beta$ -curcumene      | TRC           | 95%         | 451-56-9   |
|            | 58                 | 1,8-cineole             | TCI           | 98%         | 470-82-6   |
|            | 59                 | (+,-)-longifolene       | Sigma-Aldrich | 99%         | 475-20-7   |
|            | 60                 | p-cymene                | TCI           | 95%         | 99-87-6    |
|            | 61                 | $\beta$ -elemene        | APEXBIO       | 95%         | 515-13-9   |
|            | 62                 | camphene                | BDH           | 98%         | 79-92-5    |
|            | 63                 | (S)-cis-verbenol        | Sigma-Aldrich | 95%         | 18881-04-4 |
|            | 64                 | citronellyl acetate     | Sigma-Aldrich | 95%         | 150-84-5   |
| 65         | (+)-limonene oxide | Sigma-Aldrich           | 97%           | 203719-54-4 |            |
| Aliphatic  | 66                 | propanol                | Fluka         | 99.5%       | 71-23-8    |
|            | 67                 | 1-butanol               | Sigma-Aldrich | 99.8%       | 71-36-3    |
|            | 68                 | 2-butanol               | Sigma-Aldrich | 99.5%       | 78-92-2    |
|            | 69                 | 1-pentanol              | Fluka         | 99%         | 71-41-0    |
|            | 70                 | 2-pentanol              | Sigma-Aldrich | 98%         | 6032-29-7  |
|            | 71                 | 1-heptanol              | Fluka         | 99.5%       | 22543-790  |
|            | 72                 | 2-heptanol              | TCI           | 98%         | 543-49-7   |
|            | 73                 | 1-octen-3-ol            | Fluka         | 98%         | 3391-86-4  |
|            | 74                 | nonanol                 | Fluka         | 98%         | 143-08-8   |
|            | 75                 | (Z)-6-nonen-1-ol        | Sigma-Aldrich | 95%         | 35854-86-5 |
|            | 76                 | decanol                 | Fluka         | 97%         | 112-30-1   |
|            | 77                 | 2-methyl-1-butanol      | Sigma-Aldrich | 99%         | 137-32-6   |
|            | 78                 | 3-methyl-1-butanol      | Sigma-Aldrich | 99%         | 123-51-3   |
|            | 79                 | 2-Butyl-1-octanol       | Sigma-Aldrich | 95%         | 3913-02-8  |
|            | 80                 | 4-methylphenol          | Sigma-Aldrich | 99%         | 106-44-5   |
|            | 81                 | 1-heptaldehyde          | Fluka         | 95%         | 111-71-7   |
|            | 82                 | octanal                 | Sigma-Aldrich | 99%         | 124-13-0   |
|            | 83                 | nonanal                 | Fluka         | 97%         | 124-19-6   |
|            | 84                 | decanal                 | Fluka         | 97%         | 112-31-2   |
|            | 85                 | undecanal               | Fluka         | 97%         | 112-44-7   |
|            | 86                 | dodecyl aldehyde        | Sigma-Aldrich | 92%         | 112-54-9   |
|            | 87                 | 2-methylbutyl acetate   | Sigma-Aldrich | 99%         | 624-41-9   |
|            | 88                 | pentyl acetate          | Fluka         | 99%         | 628-63-7   |
|            | 89                 | ethyl acetate           | TCI           | 99.5%       | 141-78-6   |
|            | 90                 | ethyl butyrate          | Acros         | 99%         | 105-54-4   |
|            | 91                 | butyl butyrate          | Sigma-Aldrich | 98%         | 109-21-7   |
|            | 92                 | ethyl valerate          | Sigma-Aldrich | 98%         | 539-82-2   |
|            | 93                 | ethyl hexanoate         | Sigma-Aldrich | 99%         | 123-66-0   |
|            | 94                 | ethyl laurate           | TCI           | 99%         | 106-33-2   |
|            | 95                 | butyl hexanoate         | Sigma-Aldrich | 98%         | 626-82-4   |
|            | 96                 | butyl laurate           | Sigma-Aldrich | 99%         | 628-63-7   |
|            | 97                 | propyl hexanoate        | TCI           | 98%         | 626-77-7   |
|            | 98                 | hexyl hexanoate         | TCI           | 98%         | 6378-65-0  |
|            | 99                 | hexyl butyrate          | TCI           | 98%         | 2639-63-6  |
|            | 100                | hexyl propionate        | TCI           | 98%         | 2445-76-3  |
|            | 101                | (Z)-3-hexenyl butyrate  | Sigma-Aldrich | 98%         | 16491-36-4 |
|            | 102                | (E)-2-hexenyl butyrate  | TCI           | 93%         | 53398-83-7 |

|           |     |                                  |               |       |            |
|-----------|-----|----------------------------------|---------------|-------|------------|
| Aliphatic | 103 | (Z)-3-hexenyl salicylate         | Sigma-Aldrich | 97%   | 65405-77-8 |
|           | 104 | (Z)-3-hexenyl-2-methyl butanoate | Sigma-Aldrich | 97%   | 53398-85-9 |
|           | 105 | (Z)-3-hexenyl isovalerate        | TCI           | 98%   | 35154-45-1 |
|           | 106 | dodecane                         | Aladdin       | 99.5% | 112-40-3   |
|           | 107 | (Z)-3-hexenyl (Z)-3 hexenoate    | TCI           | 95%   | 61444-38-0 |
|           | 108 | Ethyl 2-ethylhexanoate           | TCI           | 95%   | 2983-37-1  |
|           | 109 | isoamyl butyrate                 | TCI           | 98%   | 106-27-4   |
|           | 110 | isoamyl propionate               | TCI           | 98%   | 105-68-0   |
|           | 111 | isoamyl Isovalerate              | Macklin       | 98%   | 659-70-1   |
|           | 112 | 6-methyl-5-hepten-2-one          | Sigma-Aldrich | 99%   | 110-93-0   |
|           | 113 | geranyl acetone                  | TCI           | 96%   | 689-67-8   |
|           | 114 | geranyl acetate                  | Sigma-Aldrich | 97%   | 105-87-3   |
|           | 115 | 2-acetylcyclohexanone            | Sigma-Aldrich | 97%   | 874-23-7   |
|           | 116 | 2,3-butanedione                  | Sigma-Aldrich | 97%   | 431-03-8   |
|           | 117 | 2,3-butanediol                   | TCI           | 97%   | 513-85-9   |
|           | 118 | (Z)-jasnone                      | TCI           | 92%   | 488-10-8   |
|           | 119 | methyl jasmonate                 | Sigma-Aldrich | 95%   | 39924-52-2 |
|           | 120 | jasmonic acid                    | Sigma-Aldrich | 90%   | 77026-92-7 |
|           | 121 | formate                          | TCI           | 99%   | 71-47-6    |
|           | 122 | acetic acid                      | Sigma-Aldrich | 99%   | 64-19-7    |
|           | 123 | butyl acid                       | Sigma-Aldrich | 99%   | 107-92-6   |
|           | 124 | linoleic acid                    | Sigma-Aldrich | 95%   | 60-33-3    |
|           | 125 | hexanoic acid                    | Sigma-Aldrich | 99%   | 142-62-1   |
|           | 126 | valeric acid                     | Sigma-Aldrich | 99%   | 109-52-4   |
|           | 127 | propionic acid                   | Sigma-Aldrich | 99%   | 79-09-4    |
|           | 128 | (-)-ethyl-L-lactate              | Sigma-Aldrich | 98%   | 687-47-8   |
|           | 129 | 4-methylcyclohexanol             | TCI           | 98%   | 589-91-3   |
|           | 130 | pentadecane                      | Sigma-Aldrich | 99%   | 629-62-9   |
|           | 131 | hexadecene                       | Sigma-Aldrich | 98.5% | 629-73-2   |
|           | 132 | 2-heptanone                      | Sigma-Aldrich | 98%   | 110-43-0   |
|           | 133 | butyl aldehyde                   | TCI           | 95%   | 78-84-2    |
|           | 134 | 3-heptanol                       | Fluka         | 99%   | 589-82-2   |
|           | 135 | ethyl caproate                   | Fluka         | 98%   | 123-66-0   |
|           | 136 | 2-tridecanone                    | Sigma-Aldrich | 99%   | 593-08-8   |
|           | 137 | allyl isothiocyanate             | Sigma-Aldrich | 95%   | 57-06-7    |
|           | 138 | (Z)-3-hexenyl propionate         | Macklin       | 97%   | 33467-74-2 |
|           | 139 | pentyl valerate                  | Sigma-Aldrich | 97%   | 2173-56-0  |
|           | 140 | octadecane                       | Sigma-Aldrich | 99%   | 593-45-3   |
|           | 141 | nonadecane                       | Sigma-Aldrich | 99%   | 129-92-5   |
|           | 142 | 17-pentatriacontene              | Sigma-Aldrich | 99%   | 6971-40-0  |
|           | 143 | 1-heptadecene                    | TCI           | 99.5% | 6795-39-5  |
|           | 144 | tridecanal                       | TCI           | 95%   | 10486-19-8 |
|           | 145 | 2-heptadecanone                  | Sigma-Aldrich | 99%   | 2922-51-2  |
|           | 146 | hexacosane                       | Sigma-Aldrich | 99%   | 630-01-3   |
|           | 147 | 1-nonadecene                     | TCI           | 95%   | 18435-45-5 |
|           | 148 | 2-hexadecanol                    | Sigma-Aldrich | 99%   | 14852-31-4 |
|           | 149 | ethyl (2E,4Z)-deca-2,4-dienoate  | Acros         | 97%   | 3025-30-7  |
|           | 150 | undecanoic y lactone             | Sigma-Aldrich | 99%   | 104-67-6   |



|           |                   |                           |               |          |            |
|-----------|-------------------|---------------------------|---------------|----------|------------|
| Aliphatic | 151               | pelargonic acid           | Fluka         | 95%      | 112-05-0   |
|           | 152               | lauric acid               | Fluka         | 99%      | 143-07-7   |
|           | 153               | (D,L)-lactic acid         | TCI           | 85%      | 50-21-5    |
|           | 154               | octoic acid               | BDH           | 98%      | 124-07-2   |
|           | 155               | 1-undecanol               | Sigma-Aldrich | 99%      | 112-42-5   |
|           | 156               | n-valeraldehyde           | Fluka         | 98%      | 110-82-0   |
|           | 157               | methyl laurate            | TCI           | 98%      | 111-82-0   |
|           | 158               | 1-dodecanol               | Sigma-Aldrich | 98%      | 113-53-8   |
|           | 159               | capric acid               | Fluka         | 99%      | 334-48-5   |
|           | 160               | undecylenic acid          | Beijing       | 97%      | 112-38-9   |
|           | 161               | octyl acetate             | Macklin       | 98%      | 112-14-1   |
|           | 162               | 2-methyl-1-propanol       | Macklin       | 99%      | 78-83-1    |
|           | 163               | 2-acetylthiazole          | Macklin       | 98%      | 24295-03-2 |
|           | 164               | 3-pentanone               | TCI           | 98%      | 96-22-0    |
|           | 165               | 3-heptanone               | TCI           | 98%      | 106-35-4   |
|           | 166               | 2-octanone                | TCI           | 98%      | 111-13-7   |
|           | 167               | 3-octanone                | TCI           | 98%      | 106-68-3   |
|           | 168               | 3-nonanone                | TCI           | 97%      | 925-78-0   |
|           | 169               | ethyl propionate          | TCI           | 99%      | 105-37-3   |
|           | 170               | isoamyl acetate           | TCI           | 98%      | 123-92-2   |
|           | 171               | nonyl acetate             | TCI           | 99%      | 143-13-5   |
| 172       | pyrazine          | TCI                       | 98%           | 290-37-9 |            |
| 173       | 1,4-diaminobutane | AlfaAesar                 | 98%           | 110-60-1 |            |
| Aromatic  | 174               | benzaldehyde              | Fluka         | 99%      | 100-52-7   |
|           | 175               | 4-ethyl benzaldehyde      | Sigma-Aldrich | 97%      | 4748-78-1  |
|           | 176               | benzyl alcohol            | Sigma-Aldrich | 98%      | 100-51-6   |
|           | 177               | benzyl acetate            | Fluka         | 99%      | 140-11-4   |
|           | 178               | methyl benzoate           | Sigma-Aldrich | 99%      | 93-58-3    |
|           | 179               | ethyl benzoate            | Sigma-Aldrich | 99%      | 93-89-0    |
|           | 180               | butyl benzoate            | TCI           | 99%      | 136-60-7   |
|           | 181               | methyl salicylate         | Sigma-Aldrich | 99%      | 119-36-8   |
|           | 182               | butyl salicylate          | TCI           | 99%      | 2052-14-4  |
|           | 183               | ethyl salicylate          | Sigma-Aldrich | 99%      | 119-36-8   |
|           | 184               | phenylacetaldehyde        | Sigma-Aldrich | 90%      | 122-78-1   |
|           | 185               | salicylaldehyde           | Sigma-Aldrich | 98%      | 90-02-8    |
|           | 186               | 2-phenylethyl acetate     | Fluka         | 99%      | 103-45-7   |
|           | 187               | linalyl acetate           | Sigma-Aldrich | 96%      | 115-95-7   |
|           | 188               | methyl phenylacetate      | Sigma-Aldrich | 98%      | 101-41-7   |
|           | 189               | 2-phenylethanol           | Sigma-Aldrich | 99%      | 60-12-8    |
|           | 190               | eugenol                   | Sigma-Aldrich | 98%      | 97-53-0    |
|           | 191               | anethol                   | Sigma-Aldrich | 99%      | 4180-23-8  |
|           | 192               | acetophenone              | TCI           | 98.5%    | 98-86-2    |
|           | 193               | $\beta$ -ionone           | Sigma-Aldrich | 96%      | 14901-07-6 |
|           | 194               | (+,-)-nicotine            | Sigma-Aldrich | 90%      | 22083-74-5 |
|           | 195               | (-)-nicotine              | Sigma-Aldrich | 99%      | 54-11-5    |
|           | 196               | cinnamaldehyde            | TCI           | 98%      | 14371-10-9 |
|           | 197               | 2-phenylethyl propionate  | TCI           | 98%      | 122-70-3   |
|           | 198               | 3-ethyltoluene            | Maclin        | 98%      | 620-14-4   |
|           | 199               | benzonitrile              | Sigma-Aldrich | 99%      | 100-47-0   |
|           | 200               | 3,4-dimethyl acetophenone | Sigma-Aldrich | 98%      | 3637-01-2  |
|           | 201               | (Z)-3-hexenyl benzoate    | Sigma-Aldrich | 97%      | 25152-85-6 |

|                                   |     |                             |               |       |            |
|-----------------------------------|-----|-----------------------------|---------------|-------|------------|
| Aromatic                          | 202 | DEET                        | Sigma-Aldrich | 99%   | 134-62-3   |
|                                   | 203 | dibutyl phthalate           | Sigma-Aldrich | 99%   | 95-48-7    |
|                                   | 204 | O-cresol                    | Fluka         | 98%   | 611-06-31  |
|                                   | 205 | 2,4-dichloro-1-nitrobenzene | Fluka         | 97%   | 100-02-7   |
|                                   | 206 | 4-nitrophenol               | Fluka         | 97%   | 100-02-7   |
|                                   | 207 | benzyl benzoate             | TCI           | 99%   | 120-51-4   |
|                                   | 208 | benzylamine                 | TCI           | 99%   | 100-46-9   |
| Insect sex pheromones and analogs | 209 | Z11-16:Ald                  | Shin-Etsu     | 98%   | 53939-28-9 |
|                                   | 210 | Z9-16:Ald                   | Shin-Etsu     | 98%   | 56219-04-6 |
|                                   | 211 | Z9-14:Ald                   | Shin-Etsu     | 98%   | 53939-27-8 |
|                                   | 212 | Z7-16:Ald                   | Kunbo         | 92%   | 56797-40-1 |
|                                   | 213 | 14:Ald                      | Ark Pham      | 96%   | 124-25-4   |
|                                   | 214 | 16:Ald                      | TCI           | 98%   | 629-80-1   |
|                                   | 215 | 18:Ald                      | TCI           | 98%   | 638-66-4   |
|                                   | 216 | Z11-16:OH                   | Shin-Etsu     | 98%   | 56683-54-6 |
|                                   | 217 | Z9-16:OH                    | Shin-Etsu     | 98%   | 10378-01-5 |
|                                   | 218 | Z9-14:OH                    | Kunbo         | 92%   | 35153-15-2 |
|                                   | 219 | Z11-16:OAc                  | Shin-Etsu     | 98%   | 34010-21-4 |
|                                   | 220 | Z9-16:OAc                   | Shin-Etsu     | 98%   | 34010-20-3 |
|                                   | 221 | Z9-14:OAc                   | Kunbo         | 96%   | 16725-53-4 |
|                                   | 222 | Z7-16:OAc                   | Kunbo         | 95%   | 23192-42-9 |
|                                   | 223 | Z9-E11-14:OAc               | Kunbo         | 92%   | 50767-79-8 |
|                                   | 224 | Z9-E12-14:OAc               | Kunbo         | 92%   | 51937-00-9 |
|                                   | 225 | 14:OAc                      | Ark Pham      | 96%   | 638-59-5   |
|                                   | 226 | 16:OAc                      | TRC           | 99.5% | 620-70-9   |
|                                   | 227 | 18:OAc                      | TCI           | 92%   | 822-23-1   |
|                                   | 228 | Z11-16:COOH                 | Abcam         | 98%   | 34010-21-4 |
|                                   | 229 | Z11-18:OAc                  | Cayman        | 98%   | 4273-95-4  |
|                                   | 230 | E11-16:OAc                  | Kunbo         | 92%   | 57491-33-5 |
|                                   | 231 | Z11-14:OAc                  | Kunbo         | 92%   | 20711-10-8 |
|                                   | 232 | E11-16:Ald                  | Kunbo         | 92%   | 57491-33-5 |
|                                   | 233 | Z7-12:OAc                   | Kunbo         | 92%   | 14959-86-5 |
|                                   | 234 | Z9-12:OAc                   | Kunbo         | 92%   | 16974-11-1 |
|                                   | 235 | Z11-14:Ald                  | Kunbo         | 92%   | 35237-64-0 |
|                                   | 236 | Z11-18:Ald                  | Kunbo         | 92%   | 56554-95-1 |
|                                   | 237 | E7-12:OAc                   | Kunbo         | 92%   | 16695-41-3 |

CAS: Chemical Abstracts Service; TMTT: (E,E)-4,8,12-trimethyl-1,3,7,11-tridecatetraene; DMNT: (3E)-4,8-dimethyl-1,3,7-nonatriene; DEET: N,N-Diethyl-meta-toluamide; TRC: Toronto Research Chemicals INC; TCI: Tokyo Chemical Industry CO., LTD; BDH: The British Drug Houses LTD; Fluka: Fluka Chemika; Acros: Acros organics; Kunbo: Kunbo technology, Kunming, China; Shin-Etsu: Shin-Etsu Chemicals; Beijing: Beijing Chemicals.

**Table S2. Primers for gene cloning and real-time quantitative RT-PCR.**

|                | Forward primers                                                        | Reverse primers                                         |
|----------------|------------------------------------------------------------------------|---------------------------------------------------------|
| <b>Cloning</b> |                                                                        |                                                         |
| <i>OR18</i>    | 5'- <u>ctcgag</u> c <del>caaat</del> ggcattgtccgatttaag-3'             | 5'- <u>tctag</u> a <del>ctaat</del> cttcgacttgccg-3'    |
| <i>OR26</i>    | 5'- <u>ctcgag</u> c <del>caaat</del> gaattccaacaattcc-3'               | 5'- <u>tctag</u> atcatgccattgtcctcaac-3'                |
| <i>OR30</i>    | 5'- <u>gaatt</u> c <del>caaat</del> gtctctcgagg <del>tcaaac</del> g-3' | 5'- <u>tctag</u> atc <del>atac</del> attgaacgttctaag-3' |
| <i>OR47</i>    | 5'- <u>gaatt</u> c <del>caaat</del> ggagaaggatattttcc-3'               | 5'- <u>ctcgag</u> tcattcacgaagtgaagaaaac-3'             |
| <i>OR56</i>    | 5'- <u>gaatt</u> c <del>caaat</del> ggagttgcagaaagtc-3'                | 5'- <u>ctagt</u> ctagattatcgtagcgatgctagaac-3'          |
| <i>OR70</i>    | 5'- <u>gaatt</u> c <del>caaat</del> ggcatgcttttcg <del>atc</del> -3'   | 5'- <u>ctcgag</u> ttaacgcactgatgacagg-3'                |
| <b>qRT-PCR</b> |                                                                        |                                                         |
| <i>OR18</i>    | 5'-ctgcaataaggttgacgcgt-3'                                             | 5'-cgcaacgatcgtataacccg-3'                              |
| <i>OR47</i>    | 5'-actgggaatcctggccaat-3'                                              | 5'-tgcctccaccgtacatcatt-3'                              |
| <i>Actin</i>   | 5'-ctaagctcaacgtaacggcc-3'                                             | 5'-cctccctcccttcgtttct-3'                               |
| <b>DsRNA</b>   |                                                                        |                                                         |
| <i>OR18</i>    | 5'-atggcattgtccgatttaag-3'                                             | 5'-gaagcagaagtagcatattc-3'                              |
| <i>OR18T7</i>  | 5'- <u>taatac</u> gactcactataggatggcattgtccgatttaag-3'                 |                                                         |
| <i>OR47</i>    | 5'-atggagaaggatattttcc-3'                                              | 5'-cacgtataagtaacgatgcac-3'                             |
| <i>OR47T7</i>  | 5'- <u>taatac</u> gactcactataggatggagaaggatattttcc-3'                  |                                                         |
| <i>GFP</i>     | 5'-cgaggacaacaacatggc-3'                                               | 5'-cttcaatgtgtctaat-3'                                  |
| <i>GFPT7</i>   | 5'- <u>taatac</u> gactcactataggcaggacaacaacatggc-3'                    |                                                         |

The restriction enzyme sites and T7 promoter sequence are underlined. CAAC was used as the Kozak sequence.
